# Supplementary material for: Morphological evolution of poly(glycerol monomethacrylate)-stat-glycine–phenylalanine–phenylalanine–methacrylamide-b-poly(2-hydroxypropylmethacrylate) (P(GMA-stat-(MAm-GFF))-b-PHPMA) block copolymer nano-objects via polymerization-induced self-assembly
Source: Royal Society of Chemistry journal article supplement (doi:10.1039/d2py01203k), 2022-12-12
Supplement: d2py01203k1.pdf [file d2py01203k1.pdf]

## Morphological Evolution of Poly(glycerol monomethacrylate-stat-Glycine-Phenylalanine-Phenylalanine-methacrylamide-b-Poly(2-hydroxypropylmethacrylate))

T. P. Tuyen Dao<sup>a,b,c</sup>, Lubomir Vezenkov<sup>c</sup>, Gilles Subra<sup>c</sup>, Muriel Amblard<sup>c</sup>, Vincent Ladmiral<sup>b</sup>, Mona Semsarilar<sup>a\*</sup>

a. Institut Européen des Membranes IEM, Université de Montpellier, CNRS, ENSCM, Montpellier, France.

b. Institut Charles Gerhardt Montpellier ICGM, Université de Montpellier, CNRS, ENSCM, Montpellier, France.

c. Institut des Biomolécules Max Mousseron IBMM, Université de Montpellier, CNRS, ENSCM, Montpellier, France.

### SUPPORTING INFORMATION

(a)

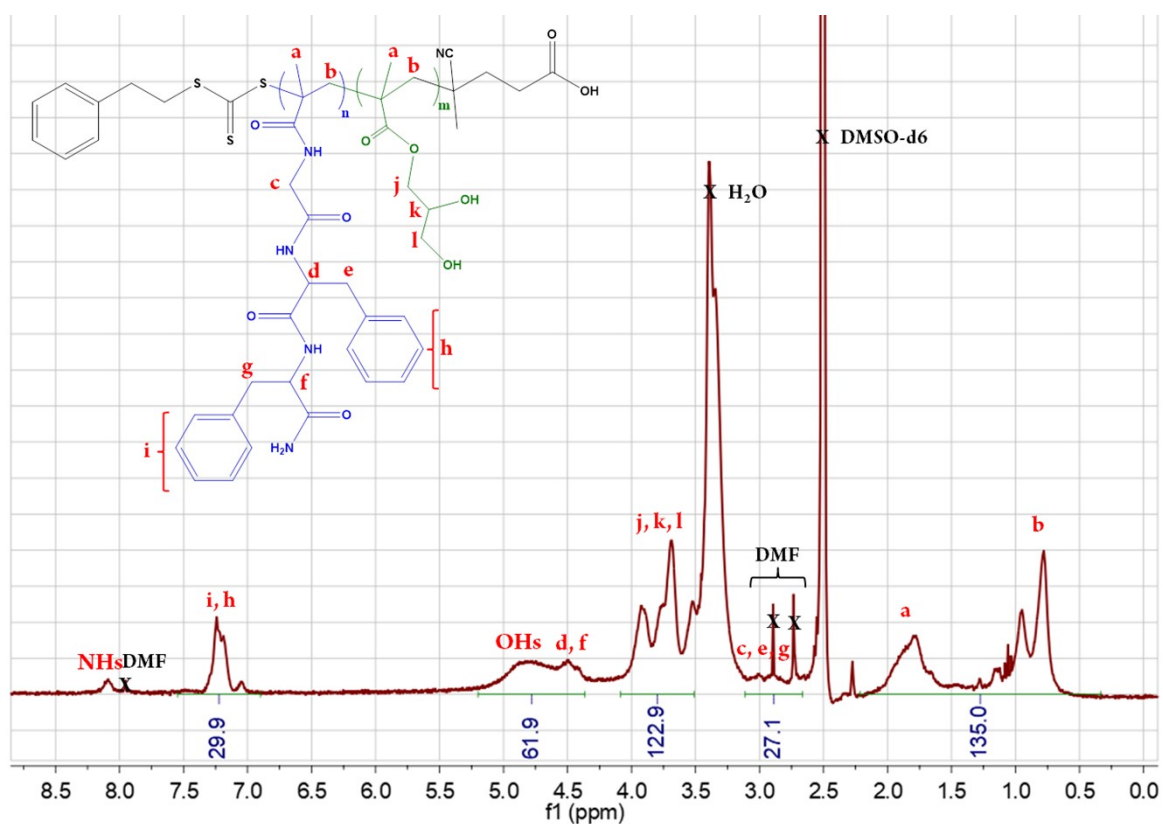

(b)

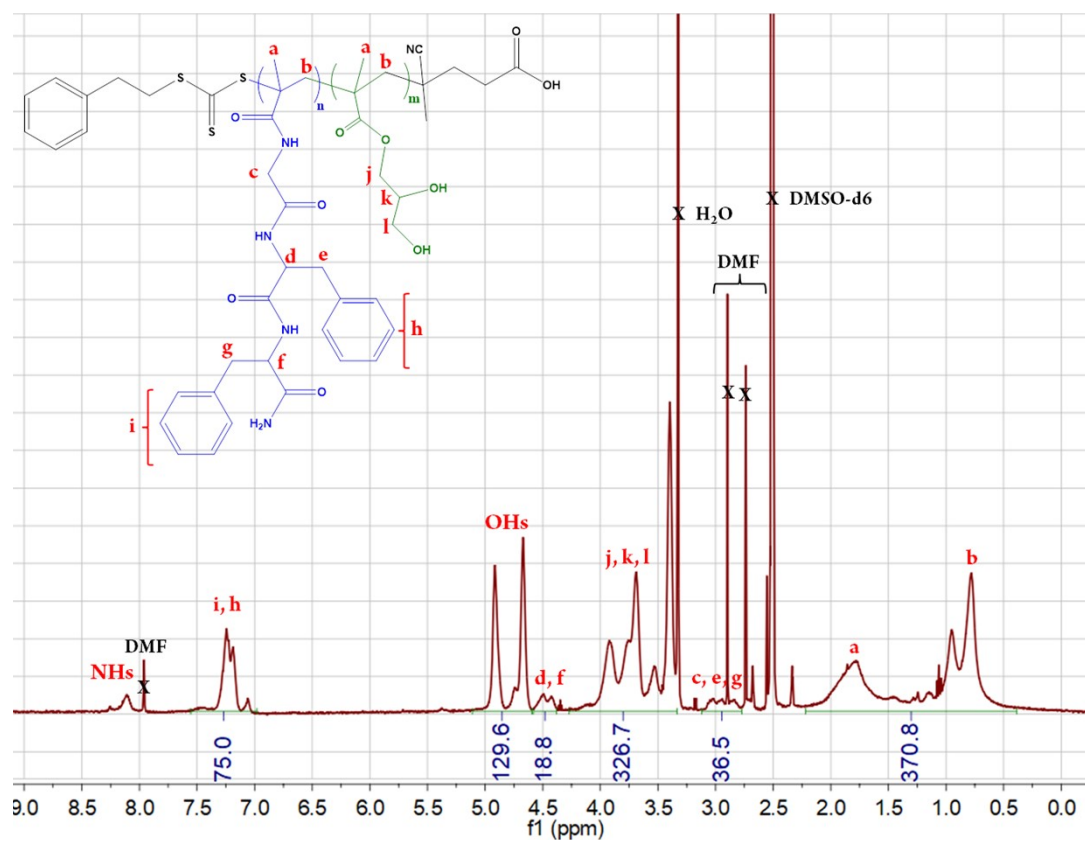

(c)

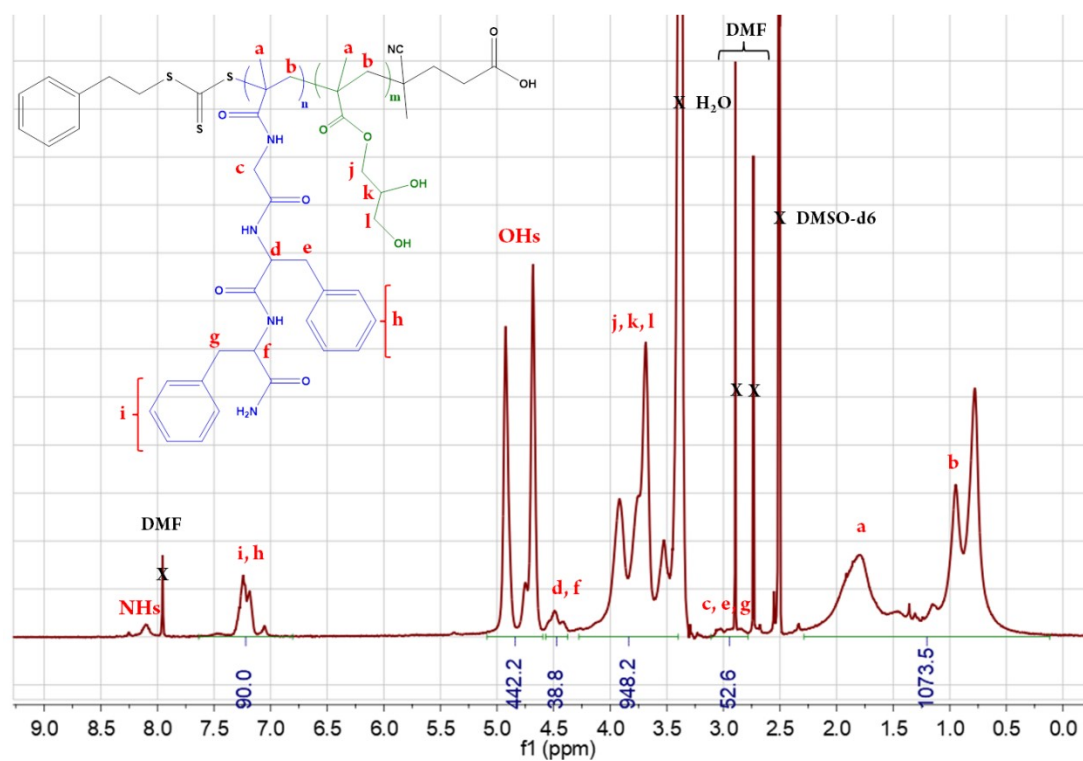

**Figure S1.** Chemical structure and <sup>1</sup>H NMR spectrum in DMSO-d<sub>6</sub> of (a) P(GMA<sub>24</sub>-stat-(MAM-GFF)<sub>3</sub>) (mCTA 1), (b) P(GMA<sub>65</sub>-stat-(MAM-GFF)<sub>7</sub>) (mCTA 2) and (c) P(GMA<sub>200</sub>-stat-(MAM-GFF)<sub>9</sub>) (mCTA 3).

## Determination of the mCTA DP and composition

The DP and composition of the mCTA were calculated from the GMA and MAM-GFF conversions determined by  $^1\text{H}$  NMR spectroscopy and the target DP of each monomers, as described in *Macromolecules* **2020**, 53, 16, 7034–7043.

$\text{DP}_{\text{MAM-GFF}} = [\text{MAM-GFF}]_0 / [\text{PETTC}]_0 \times \alpha_{\text{MAM-GFF}}$  and  $\text{DP}_{\text{GMA}} = [\text{GMA}]_0 / [\text{PETTC}]_0 \times \alpha_{\text{GMA}}$ , where  $\alpha_{\text{MAM-GFF}}$  and  $\alpha_{\text{GMA}}$  are the conversions in MAM-GFF and GMA respectively.

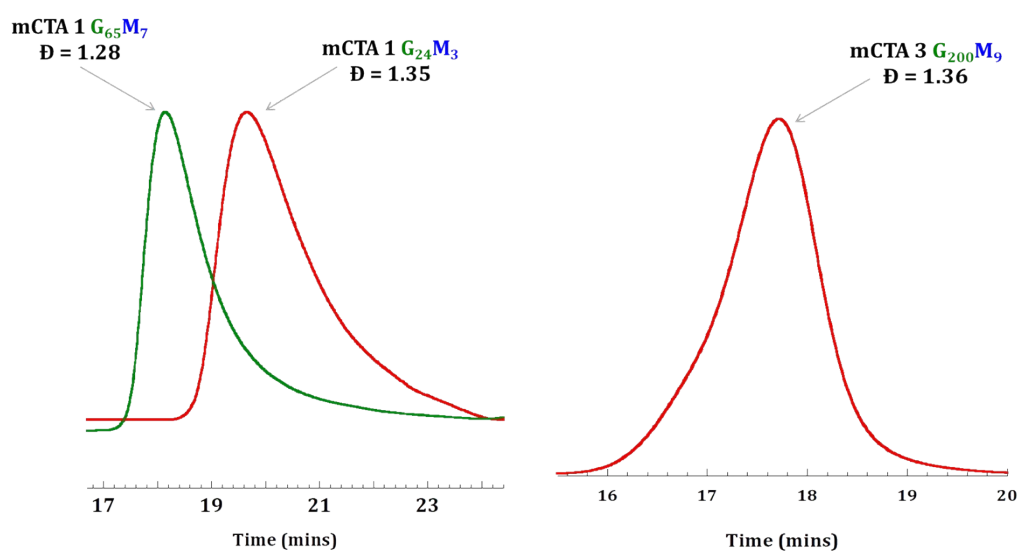

**Figure S2.** DMF SEC data of P(GMA<sub>24</sub>-stat-(MAM-GFF)<sub>3</sub>) (mCTA 1), P(GMA<sub>65</sub>-stat-(MAM-GFF)<sub>7</sub>) (mCTA 2) and DMAc SEC data P(GMA<sub>200</sub>-stat-(MAM-GFF)<sub>9</sub>) (mCTA 3).

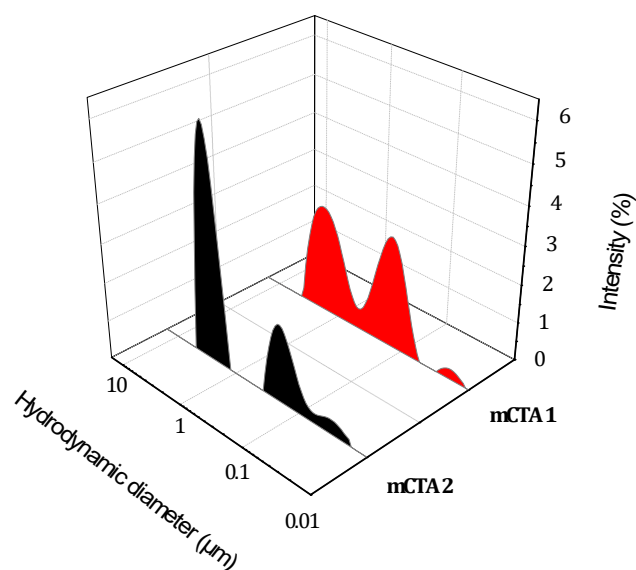

**Figure S3.** Intensity-average hydrodynamic diameter distributions of P(GMA<sub>24</sub>-*stat*-(MAm-GFF)<sub>3</sub>) (mCTA 1) and P(GMA<sub>65</sub>-*stat*-(MAm-GFF)<sub>7</sub>) (mCTA 2) in MilliQ water at 0.1 % w/w at 30°C.

**Table S1.** Molecular characterization (SEC in DMF) of P(GMA-*stat*-(MAm-GFF)) macro-CTAs and P(GMA-*stat*-(MAm-GFF))-*b*-PHPMA synthesized at 10% w/w solids via RAFT dispersion polymerization of HPMA in water and water-ethanol mixtures at 70 °C.

| No. | Composition                                      | Solvent                         | Mn (g/mol) | Mw (g/mol) | Đ    |
|-----|--------------------------------------------------|---------------------------------|------------|------------|------|
| 1   | G <sub>24</sub> M <sub>3</sub>                   | DMF                             | 6600       | 8900       | 1.35 |
| 2   | G <sub>24</sub> M <sub>3</sub> H <sub>14</sub>   | H <sub>2</sub> O                | 10200      | 13300      | 1.31 |
| 3   | G <sub>24</sub> M <sub>3</sub> H <sub>29</sub>   | H <sub>2</sub> O                | 13700      | 16590      | 1.23 |
| 4   | G <sub>24</sub> M <sub>3</sub> H <sub>58</sub>   | H <sub>2</sub> O                | 18100      | 21800      | 1.21 |
| 5   | G <sub>24</sub> M <sub>3</sub> H <sub>108</sub>  | H <sub>2</sub> O                | 37400      | 46000      | 1.23 |
| 6   | G <sub>65</sub> M <sub>7</sub>                   | DMF                             | 13300      | 17000      | 1.28 |
| 7   | G <sub>65</sub> M <sub>7</sub> H <sub>42</sub>   | H <sub>2</sub> O                | 23100      | 29000      | 1.26 |
| 8   | G <sub>65</sub> M <sub>7</sub> H <sub>54</sub>   | H <sub>2</sub> O                | 27000      | 33600      | 1.24 |
| 9   | G <sub>65</sub> M <sub>7</sub> H <sub>63</sub>   | H <sub>2</sub> O                | 33700      | 42000      | 1.25 |
| 10  | G <sub>65</sub> M <sub>7</sub> H <sub>200</sub>  | H <sub>2</sub> O                | 60000      | 74700      | 1.25 |
| 11  | G <sub>65</sub> M <sub>7</sub> H <sub>66</sub>   | 1 H <sub>2</sub> O : 1 EtOH     | 34200      | 43000      | 1.24 |
| 12  | G <sub>65</sub> M <sub>7</sub> H <sub>66</sub>   | 1.2 H <sub>2</sub> O : 0.8 EtOH | 34000      | 43000      | 1.26 |
| 13  | G <sub>65</sub> M <sub>7</sub> H <sub>66</sub>   | 1.6 H <sub>2</sub> O : 0.4 EtOH | 33900      | 42000      | 1.24 |
| 14  | G <sub>200</sub> M <sub>9</sub>                  | DMF                             | 32100      | 44000      | 1.36 |
| 15  | G <sub>200</sub> M <sub>9</sub> H <sub>51</sub>  | H <sub>2</sub> O                | 80300      | 107000     | 1.33 |
| 16  | G <sub>200</sub> M <sub>9</sub> H <sub>102</sub> | H <sub>2</sub> O                | 130400     | 172000     | 1.33 |
| 17  | G <sub>200</sub> M <sub>9</sub> H <sub>250</sub> | H <sub>2</sub> O                | 241000     | 309500     | 1.28 |
| 18  | G <sub>200</sub> M <sub>9</sub> H <sub>510</sub> | H <sub>2</sub> O                | 524700     | 645400     | 1.23 |
